# Supplementary material for: Catalytic reduction of 4-nitrophenol with gold nanoparticles stabilized by large-ring cyclodextrins
Source: Royal Society of Chemistry journal article supplement (doi:10.1039/d0nj03687k), 2020-01-01
Supplement: d0nj03687k1.pdf [file d0nj03687k1.pdf]

## Supporting Information

### Catalytic reduction of 4-nitrophenol with gold nanoparticles stabilized by large-ring cyclodextrins

Sébastien Noël,<sup>a</sup> Hervé Bricout,<sup>a</sup> Ahmed Addad,<sup>b</sup> Christian Sonnendecker,<sup>c</sup> Wolfgang Zimmermann,<sup>c</sup> Eric Monflier<sup>a</sup> and Bastien Léger<sup>\*a</sup>

<sup>a</sup> Dr. S. Noël, Dr. H. Bricout, Prof. Dr. E. Monflier, Dr. B. Léger, Univ. Artois, CNRS, Centrale Lille, Univ. Lille, UMR 8181, Unité de Catalyse et de Chimie du Solide (UCCS), 62300 Lens, France.

<sup>b</sup> Dr. A. Addad, UMET, UMR CNRS 8207, Université de Lille, 59655 Villeneuve d'Ascq, France.

<sup>c</sup> Dr. C. Sonnendecker, Prof. Dr. W. Zimmermann, Institute of Analytical Chemistry, Leipzig University, 04103 Leipzig, Germany.

\* e-mail : [bastien.leger@univ-artois.fr](mailto:bastien.leger@univ-artois.fr)

|                                                                                                                                                                                          | Page |
|------------------------------------------------------------------------------------------------------------------------------------------------------------------------------------------|------|
| <b>Figure S1.</b> Photograph of Au_LR-CD NP after reduction step in alkaline aqueous solution.                                                                                           | 2    |
| <b>Figure S2.</b> XPS spectra of Au NP stabilized by (a) $\alpha$ -CD, (b) $\beta$ -CD, (c) $\gamma$ -CD, and (d) LR-CD.                                                                 | 3    |
| <b>Figure S3.</b> Liquid UV-Vis spectra of (a) Au_ $\alpha$ -CD NP, (b) Au_ $\beta$ -CD NP, (c) Au_ $\gamma$ -CD NP, (d) Au_LR-CD NP and (e) superposition of all of the UV-Vis spectra. | 4    |
| <b>Figure S4.</b> Successive UV-Vis spectra of Au_LR-CD NP at different time from 1h to 4h.                                                                                              | 5    |
| <b>Figure S5.</b> Size distribution in volume of (a) Au_ $\alpha$ -CD NP, (b) Au_ $\beta$ -CD NP, (c) Au_ $\gamma$ -CD NP and (d) Au_LR-CD NP obtained by Dynamic Light Scattering.      | 6    |
| <b>Figure S6.</b> Scheme of the catalytic reduction of 4-nitrophenol into 4-aminophenol by Au NP in the presence of an excess of NaBH <sub>4</sub> .                                     | 7    |
| <b>Figure S7.</b> UV-Vis absorption spectra during the reaction of 4-nitrophenol with NaBH <sub>4</sub> without any Au NP.                                                               | 7    |
| <b>Figure S8.</b> UV-Vis absorption spectra during the reduction of 4-nitrophenol with NaBH <sub>4</sub> by (a) Au_ $\alpha$ -CD NP, (b) Au_ $\beta$ -CD NP and (c) Au_ $\gamma$ -CD NP. | 8    |
| <b>Figure S9.</b> Determination of the $k_{app}$ values relating to 4-nitrophenol reduction catalyzed by Au_ $\alpha$ -CD NP, Au_ $\beta$ -CD NP, Au_ $\gamma$ -CD NP and Au_LR-CD NP.   | 9    |
| <b>Figure S10.</b> T-ROESY spectrum of 4-nitrophenol + LR-CD mixture in D <sub>2</sub> O considering [4-nitrophenol] = 6 mM, [LR-CD] = 6 mM and [NaBH <sub>4</sub> ] = 0.26 M at 20 °C.  | 10   |

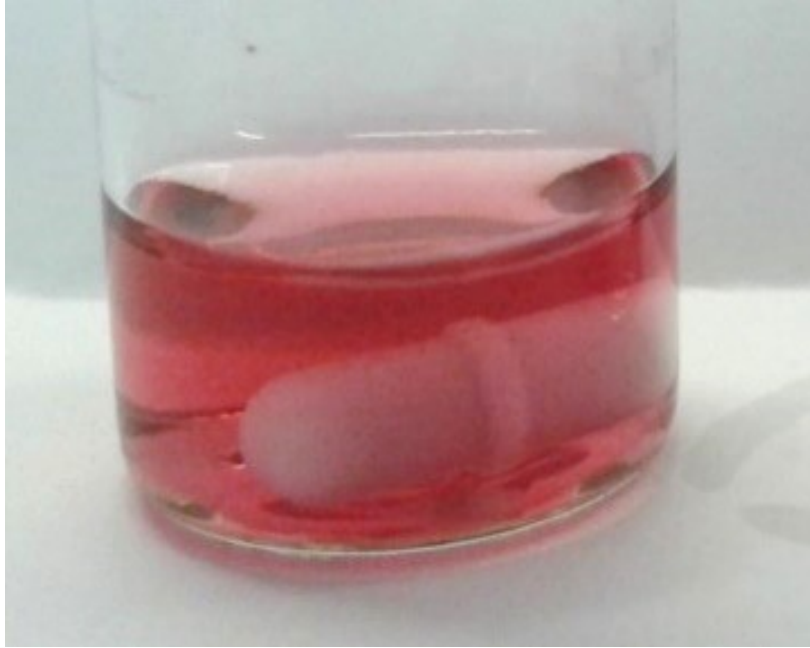

**Figure S1.** Photograph of Au\_LR-CD NP after reduction step in alkaline aqueous solution.

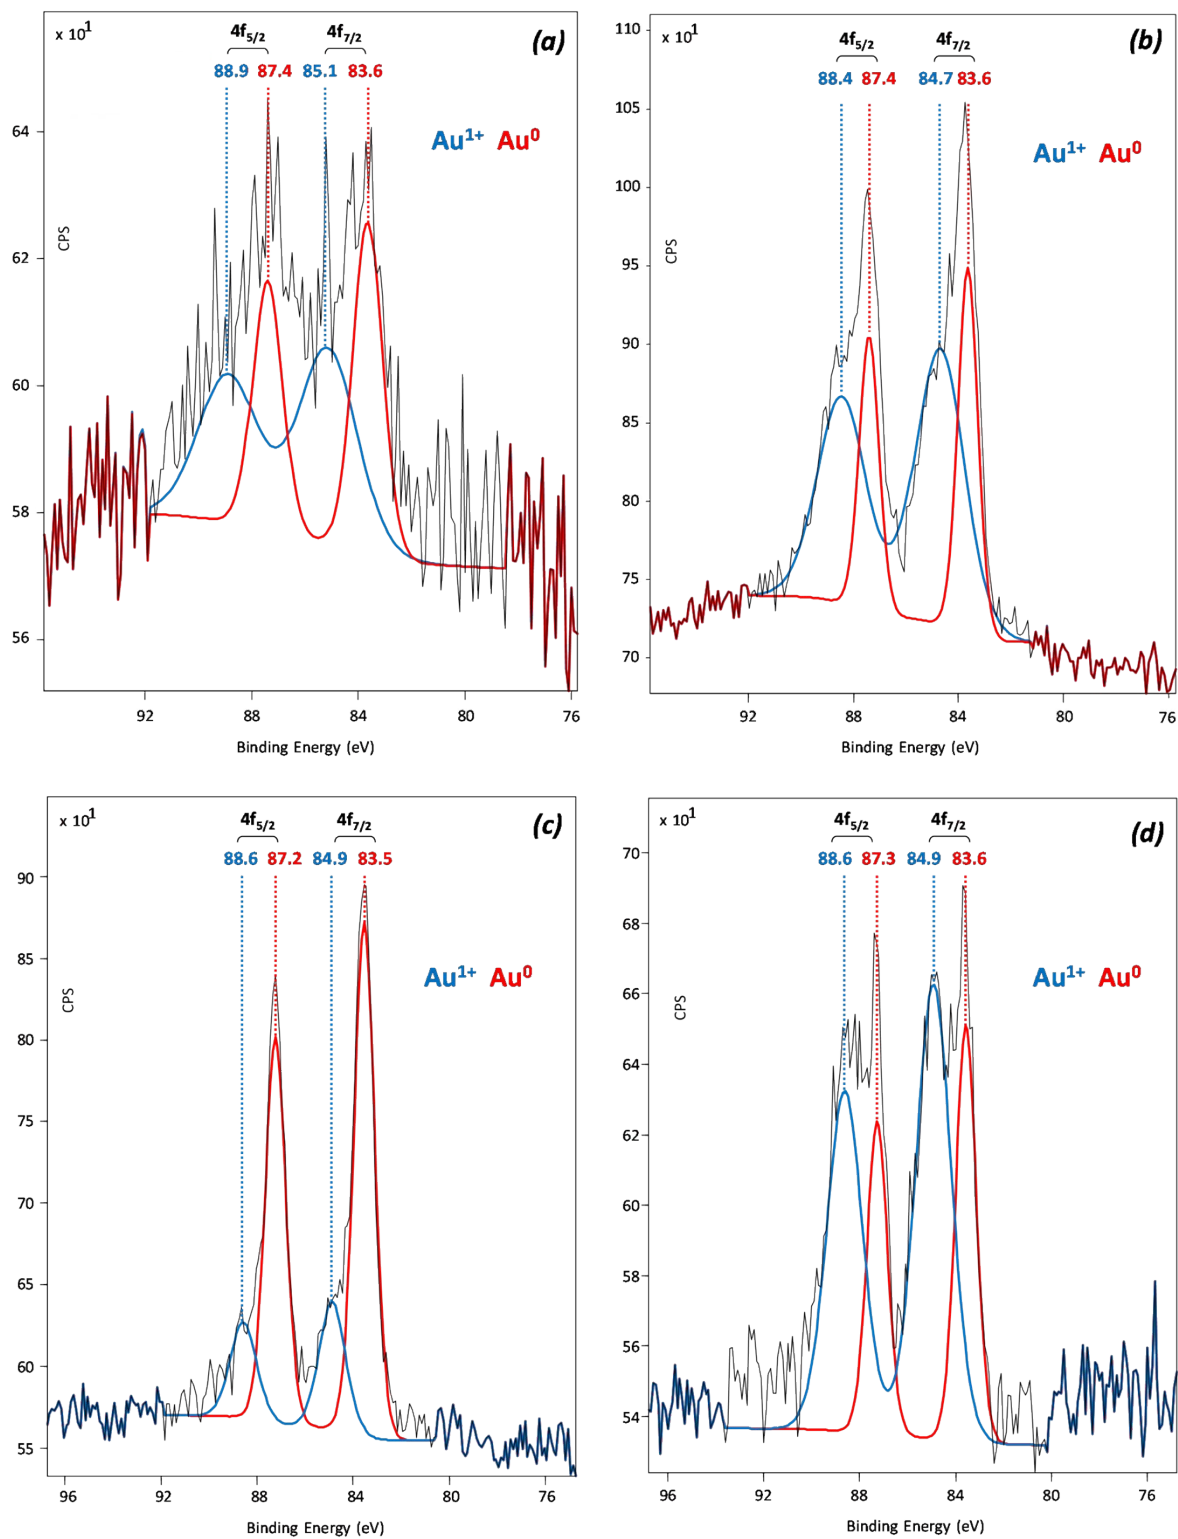

**Figure S2.** XPS spectra of Au NP stabilized by (a)  $\alpha$ -CD, (b)  $\beta$ -CD, (c)  $\gamma$ -CD, and (d) LR-CD.

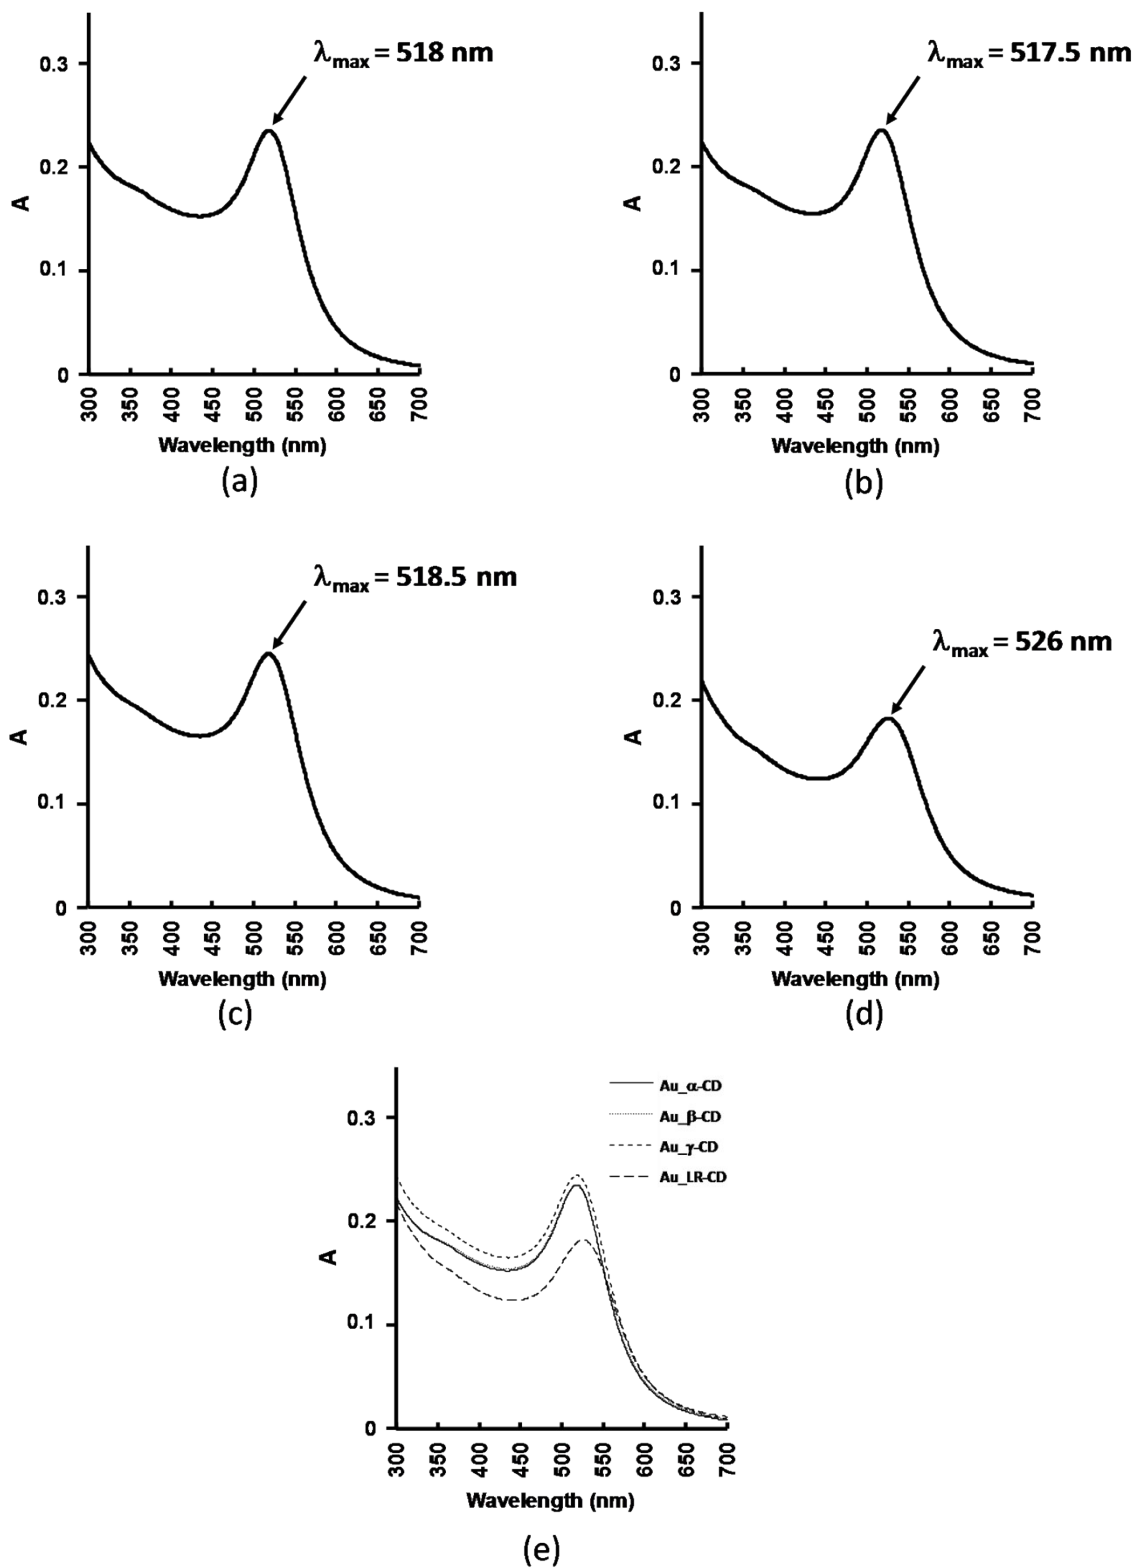

**Figure S3.** Liquid UV-Vis spectra of (a) Au\_α-CD NP, (b) Au\_β-CD NP, (c) Au\_γ-CD NP, (d) Au\_LR-CD NP and (e) superposition of all of the UV-Vis spectra.

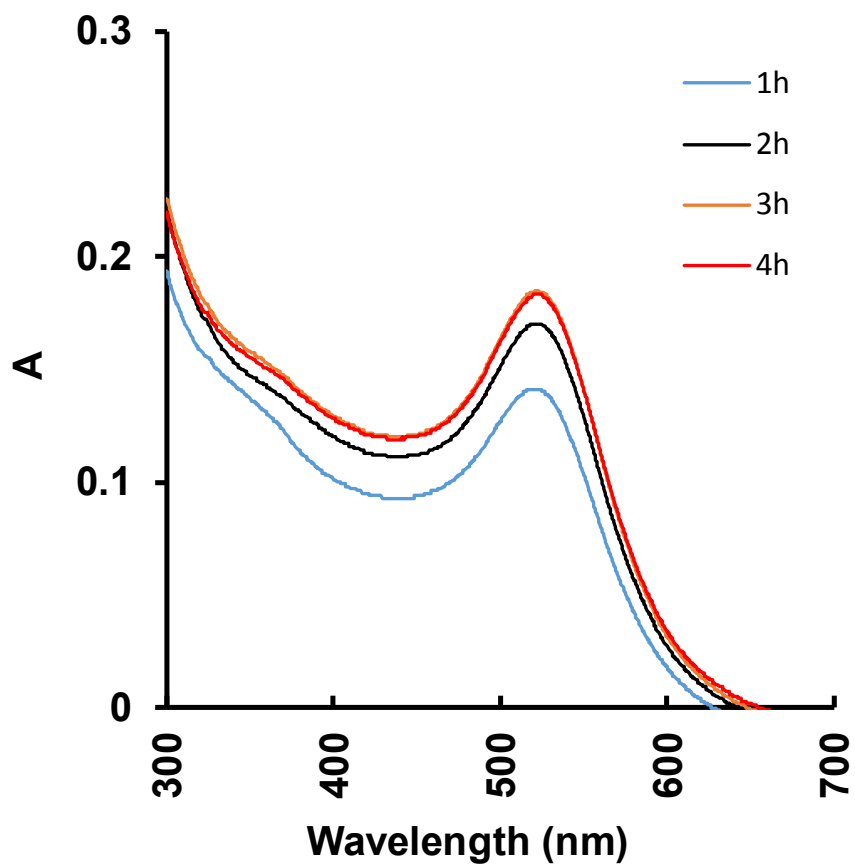

**Figure S4.** Successive UV-Vis spectra of Au\_LR-CD NP at different time from 1h to 4h.

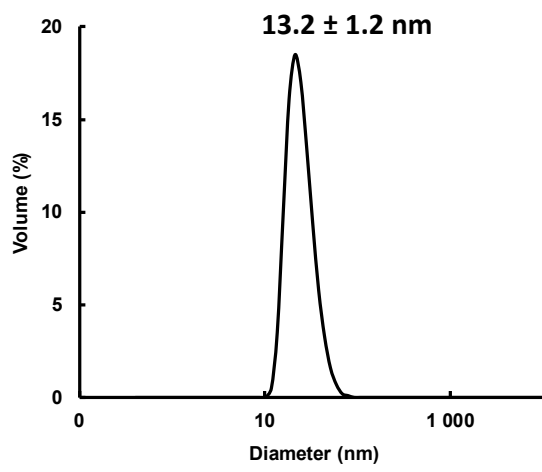

(a)

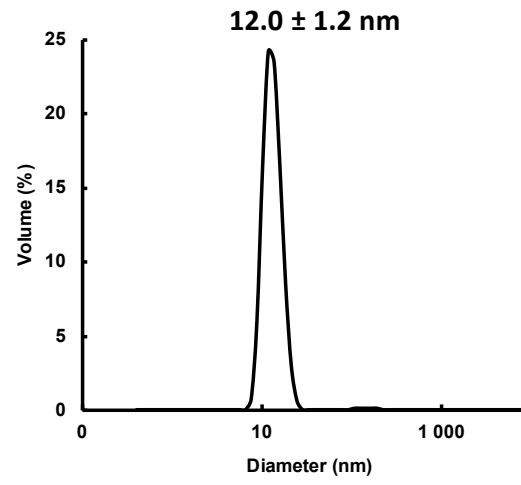

(b)

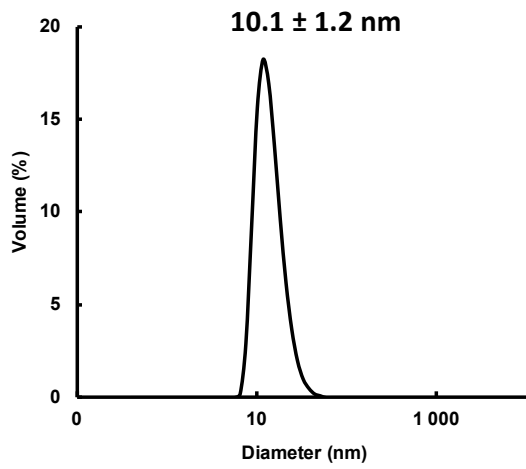

(c)

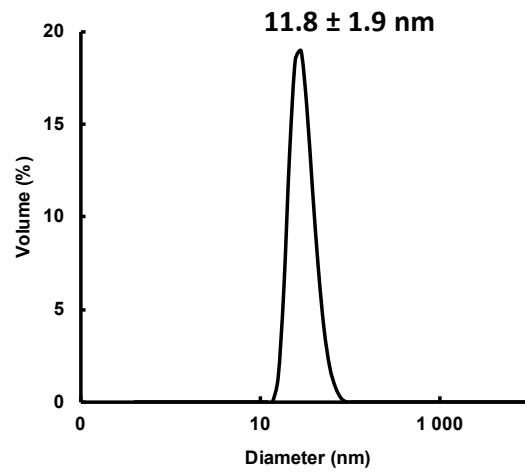

(d)

**Figure S5.** Size distribution in volume of (a) Au<sub>α</sub>-CD NP, (b) Au<sub>β</sub>-CD NP, (c) Au<sub>γ</sub>-CD NP and (d) Au<sub>LR</sub>-CD NP obtained by Dynamic Light Scattering.

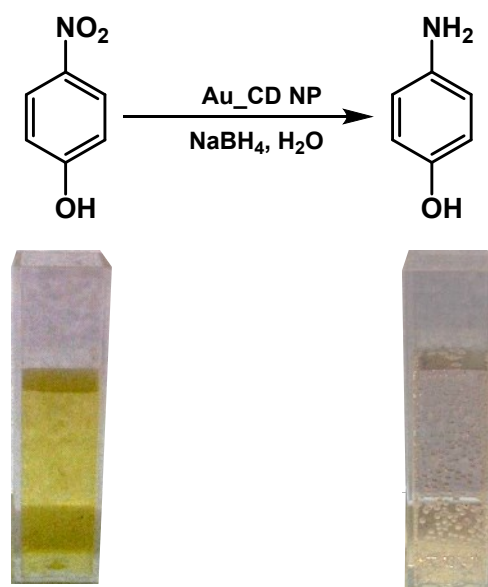

**Figure S6.** Scheme of the catalytic reduction of 4-nitrophenol into 4-aminophenol by Au NP in the presence of an excess of  $\text{NaBH}_4$ .

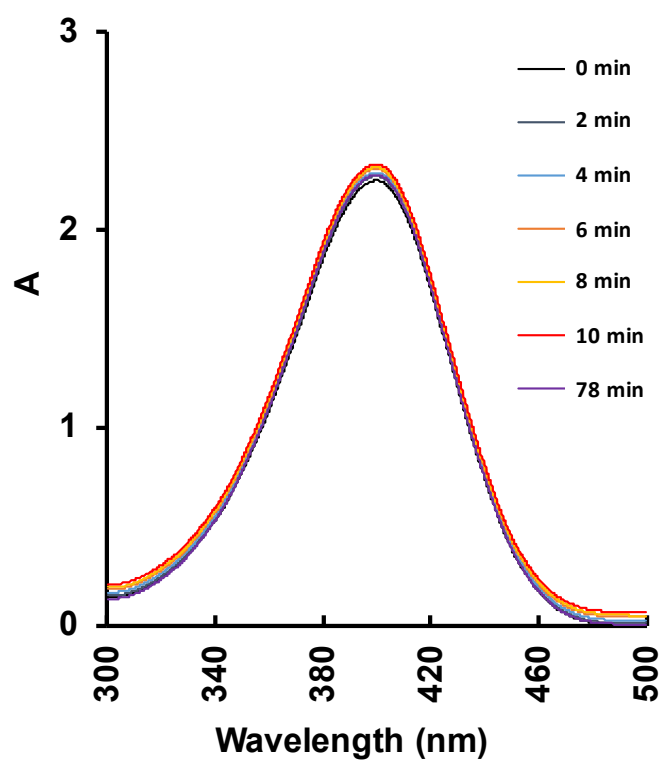

**Figure S7.** UV-Vis absorption spectra during the reaction of 4-nitrophenol with  $\text{NaBH}_4$  without any Au NP.

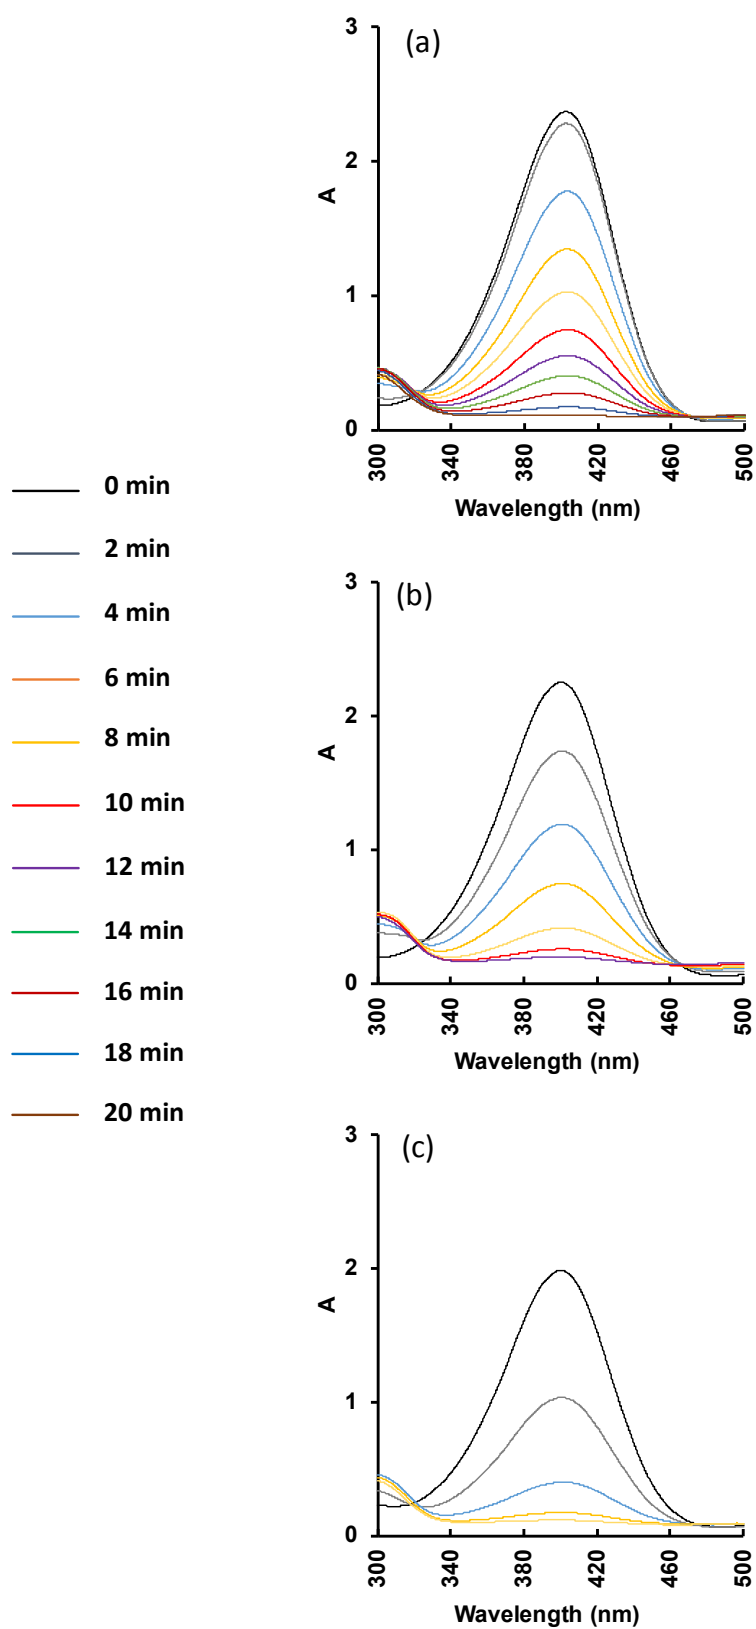

**Figure S8.** UV-Vis absorption spectra during the reduction of 4-nitrophenol with NaBH<sub>4</sub> by (a) Au<sub>α</sub>-CD NP, (b) Au<sub>β</sub>-CD NP and (c) Au<sub>γ</sub>-CD NP.



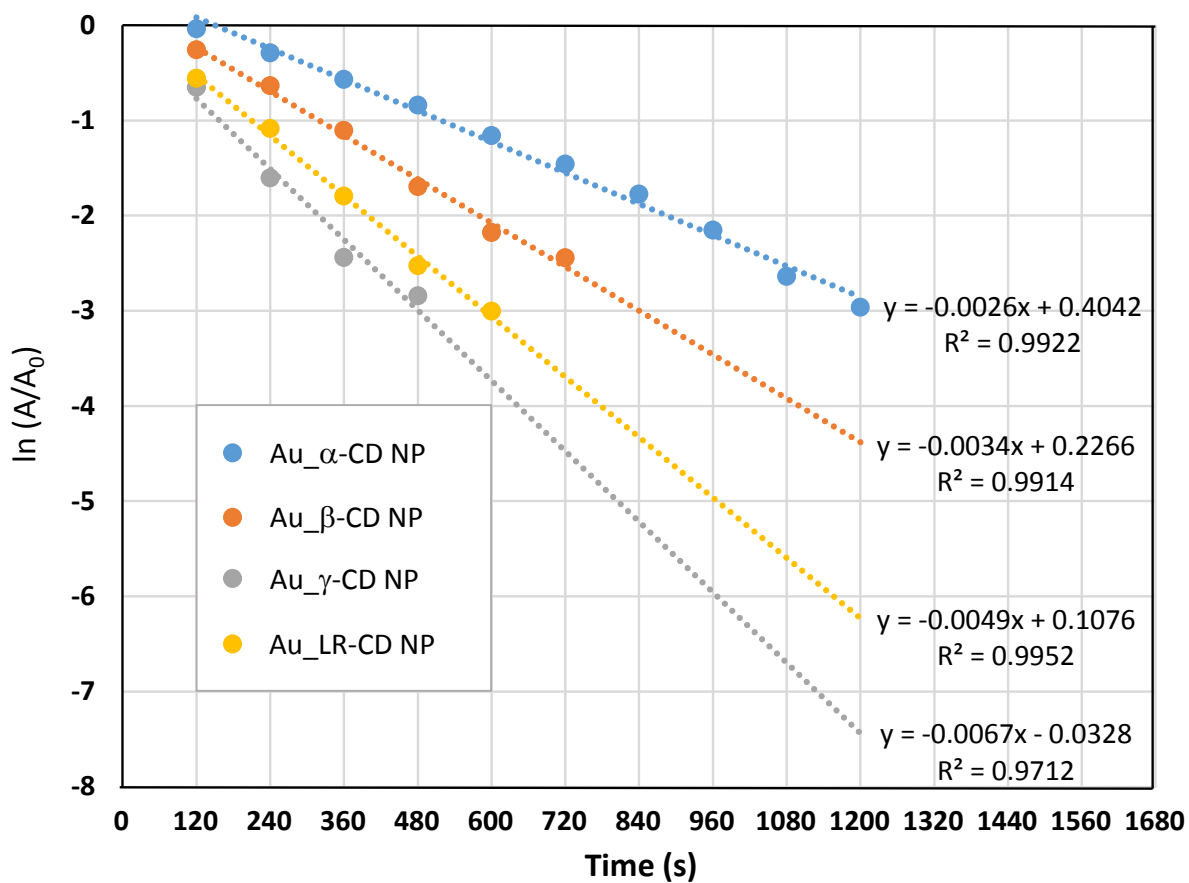

**Figure S9.** Determination of the  $k_{app}$  values relating to 4-nitrophenol reduction catalyzed by Au\_α-CD NP, Au\_β-CD NP, Au\_γ-CD NP and Au\_LR-CD NP

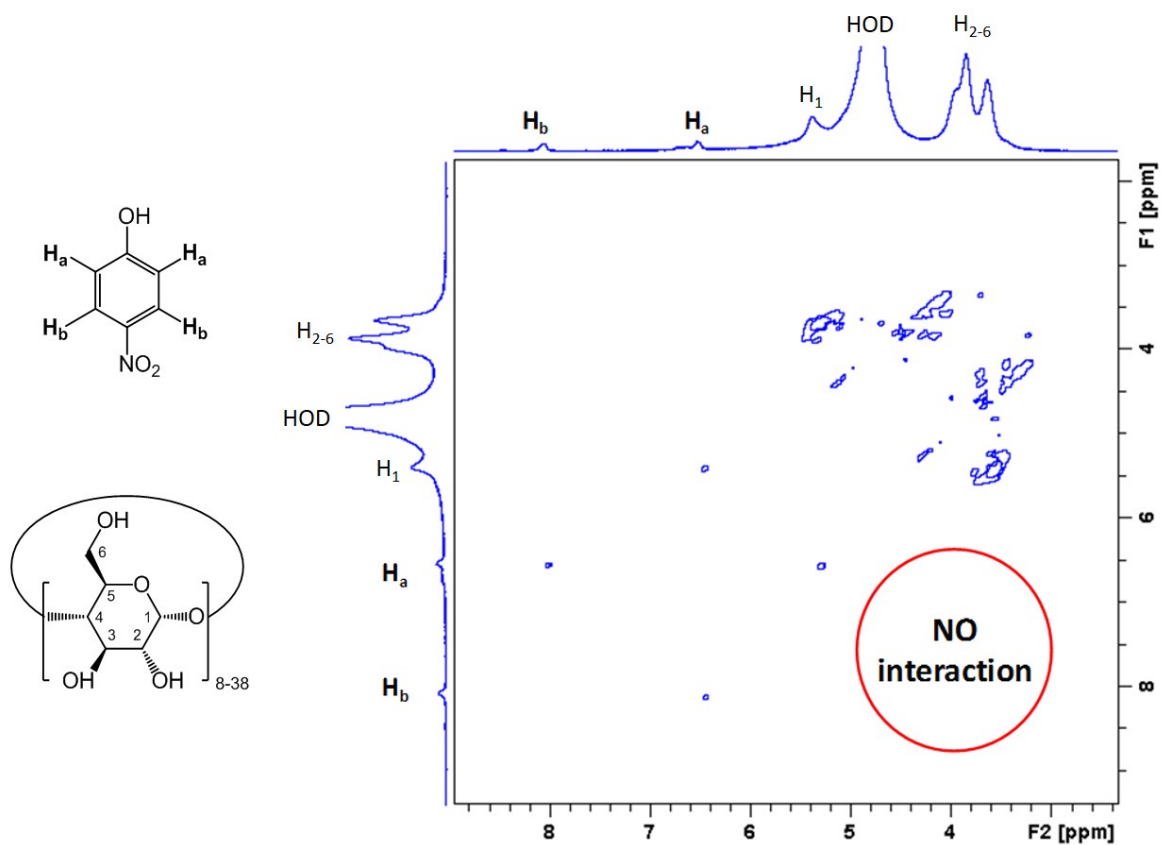

**Figure S10.** T-ROESY spectrum of 4-nitrophenol + LR-CD in  $D_2O$  considering [4-nitrophenol] = 6 mM, [LR-CD] = 6 mM and  $[NaBH_4] = 0.26$  M at 20 °C.
